# Supplementary material for: Room temperature synthesis of blue and green emitting CsPbBr3 perovskite nanocrystals confined in mesoporous alumina film
Source: Royal Society of Chemistry journal article supplement (doi:10.1039/c9cc01040h), 2019-01-01
Supplement: c9cc01040h1.pdf [file c9cc01040h1.pdf]

## Supplementary Information

# Room temperature synthesis of blue and green emitting CsPbBr<sub>3</sub> perovskite nanocrystals confined in mesoporous alumina film

Daimiota Takhellambam, <sup>‡a</sup> Tinku Ram Meena <sup>‡a</sup> and Debrina Jana\*<sup>a</sup>

<sup>a</sup> Department of Chemical Sciences  
Indian Institute of Science Education and Research Mohali  
SAS Nagar, Mohali 140306, India  
\*E-mail: debrina@iisermohali.ac.in

### Table of Contents

|                                                                                                                                                       |     |
|-------------------------------------------------------------------------------------------------------------------------------------------------------|-----|
| Experimental Procedures                                                                                                                               | 2,3 |
| Figure S1. Low angle XRD of $\gamma$ -Al <sub>2</sub> O <sub>3</sub> film                                                                             | 4   |
| Figure S2. PL spectra of CsPbBr <sub>3</sub> NCs-Al <sub>2</sub> O <sub>3</sub> composite films prepared with varying concentrations of CsBr solution | 4   |
| Figure S3. UV-visible spectrum of the CsPbBr <sub>3</sub> NCs-Al <sub>2</sub> O <sub>3</sub> composite film                                           | 5   |
| Figure S4. PL spectra and decay curves for few blue and green films                                                                                   | 6   |
| Figure S5. TEM image of CsPbBr <sub>3</sub> NCs-Al <sub>2</sub> O <sub>3</sub> composite film using high concentrations of precursor solutions        | 7   |
| Figure S6. PL spectra of few CsPbBr <sub>3</sub> NCs-Al <sub>2</sub> O <sub>3</sub> composite film using high concentrations of precursor solutions   | 7   |
| Figure S7. PL spectra and decay curves of CsPbBr <sub>3</sub> NCs-Al <sub>2</sub> O <sub>3</sub> composite films to check stability                   | 8   |
| Table S1. Fitting parameters for PL decay graphs and related calculations                                                                             | 8   |
| References                                                                                                                                            | 8   |

## Experimental details

### Materials

Aluminum-tri-sec-butoxide (ASB), Pluronic F127, PbBr<sub>2</sub> (98%) were supplied by Sigma-Aldrich; while 1-propanol (CH<sub>3</sub>CH<sub>2</sub>CH<sub>2</sub>OH), hydrochloric acid (HCl) and methanol were obtained from s. d. fine-chem limited and Ranbuxy fine chemicals. CsBr (99.9%) and N,N-Dimethylformamide (DMF, 98%) were purchased from Alfa-Aesar and SRL Pvt. Ltd. respectively. Coumarin 540A was obtained from Exciton. Mili-Q (Millipore) water (18 MΩ) was used throughout the study.

### Methods

For preparation of boehmite sol, Yoldas method was followed which involves hot hydrolysis (>80 °C) of ASB and subsequent peptization of boehmite precipitates using HCl.<sup>1</sup> The molar ratios of water/ASB and HCl/ASB were 100 and 0.10, respectively. Post peptization, the sol was stirred vigorously in refluxing condition for 5 h and then kept another 48 h under refluxing condition without stirring. The resultant sol was concentrated to about 7.5 wt % of AlO<sub>1.5</sub> content by distilling off the butan-2-ol and some portion of water. Required amount of methanol was added to bring the AlO<sub>1.5</sub> content to 5.3 wt%. In the next step, mesoporous alumina films were prepared from boehmite sol using F127 as structure directing agent. A calculated amount of F127 (0.001 mol per mol of AlO<sub>1.5</sub>) was dissolved in 1-propanol and boehmite sol was added to it. AlO<sub>1.5</sub> content at this stage was maintained at 4 wt% and micellar arrangement forms inside the sol. This sol was used for preparation of the films on glass slides using dip-coating method by single dipping technique. The as-prepared films were dried initially at 60 °C in a hot-air oven. Surfactant from the films were removed by calcination at 500 °C (ramp of 2 °C min<sup>-1</sup> with a holding time of 60 min) in case of glass substrates whereas ethanol extraction method was used for flexible polypropylene and polyethylene terephthalate sheets. Thus, mesoporous alumina film was formed on the glass slide/polypropylene sheet. For generation of PNCs inside the mesoporous film matrix, two-step dipping procedure was undertaken. First, the mesoporous alumina film was dipped into 0.025-0.5 M PbBr<sub>2</sub> solution in DMF with a holding time of 2 min and withdrawal speed was maintained at 140 mm/s. This film was kept in air for about 45 s before washing it in DMF solvent, followed by oven drying

for 15 min at 60 °C. 0.025-0.5 M solution of CsBr was prepared in water: ethanol mixture (1.5/6.5 v/v), and stirred for 30 min. The oven dried film was kept in open air for some time to come back at room temperature and then it was dipped in CsBr solution with a holding time of 45 s. Withdrawal speed was maintained as above and finally the slide was washed with ethanol and put inside desiccator. Vacuum pump attached to the desiccator was kept switched on for 10 mins initially and then it was removed. The slide was kept inside desiccator overnight in this condition and all the characterizations were done after that.

## **Characterization**

UV-visible spectra of the films deposited on silica/quartz glass substrates were measured using Cary 5000 UV-Vis NIR (Agilent Technologies) spectrophotometer at the scan rate of 1 nm/s. Photoluminescence (PL) spectra were recorded using Horiba Fluoromax-4 with slit widths of 1 nm x 1.5 nm and a scan integration time of 0.5 s at an excitation wavelength  $\lambda_{\text{ex}} = 400$  nm. The PL lifetime measurements were carried out using Horiba Fluorohub-B at an excitation wavelength of 375 nm using a pico second diode laser at a repetition rate of 1 Mhz. The instrument response function (IRF) was recorded using 1% ludox (colloidal silica) solution. For relative PL quantum yield (PL QY), same alumina film was soaked in  $10^{-4}$  M Coumarin 540A dye solution (standard QY of 53%) in ethanol and was used as reference.<sup>2</sup> Grazing incidence X ray diffraction (GIXRD) pattern of the thin films were recorded by Rigaku Smartlab GIXRD machine using Cu K $\alpha$  ( $\lambda \approx 1.54059$  Å) radiation operating at 9 kW (tube current 200 mA and tube voltage 45 kV) equipped with a rotating anode. X-ray intensity was enhanced using cross-beam optics. Grazing incidence angle was maintained at 0.3 °. Transmission electron microscopic (TEM) measurements were carried out with Tecnai G<sup>2</sup> 30ST (FEI) and Tecnai G<sup>2</sup> 20 STWIN (FEI) equipped with energy dispersive X-ray scattering (EDS) facility. For TEM sample preparation, scratched off coatings were dispersed in acetone and drop casted onto the carbon-coated grid. The thickness of the coatings was measured by a Surfcoorder SE-2300 profilometer (Kosaka Laboratory Ltd., Japan). Nitrogen adsorption-desorption isotherms of the scratched off film samples were performed at -196 °C using BELSORP Max instrument. BET and BJH models were used to evaluate the surface area and porosity of the films, respectively. The pore size distributions of the films were determined from the adsorption bench of the isotherms. Prior to analysis, heat-treated (500 °C) alumina film samples were degassed at 125 °C under vacuum ( $1.99 \times 10^{-4}$  Pa) for 5 h.

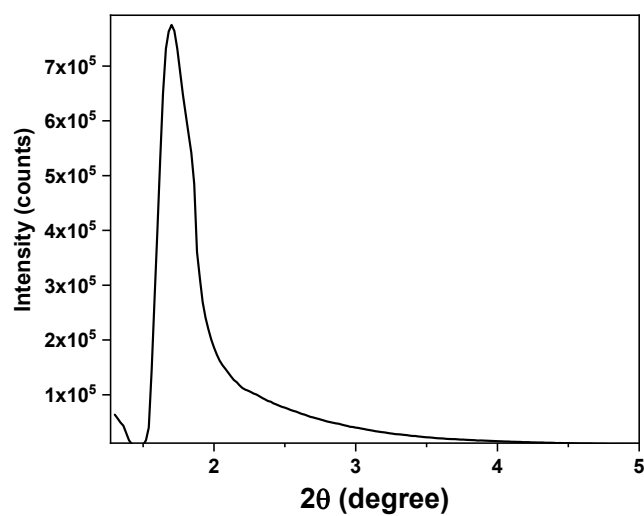

**Figure S1.** Low angle XRD of  $\gamma$ -Al<sub>2</sub>O<sub>3</sub> film shows broad peak indicating the existence of disordered mesopores.

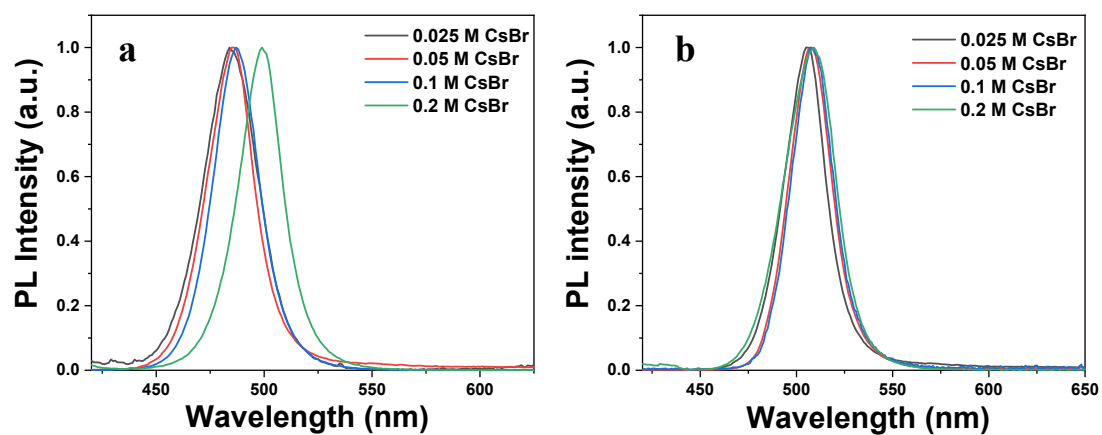

**Figure S2.** Photoluminescence spectra of CsPbBr<sub>3</sub> NCs-Al<sub>2</sub>O<sub>3</sub> composite films prepared using variable concentrations of CsBr keeping PbBr<sub>2</sub> concentration fixed at (a) 0.025 M and (b) 0.1 M.

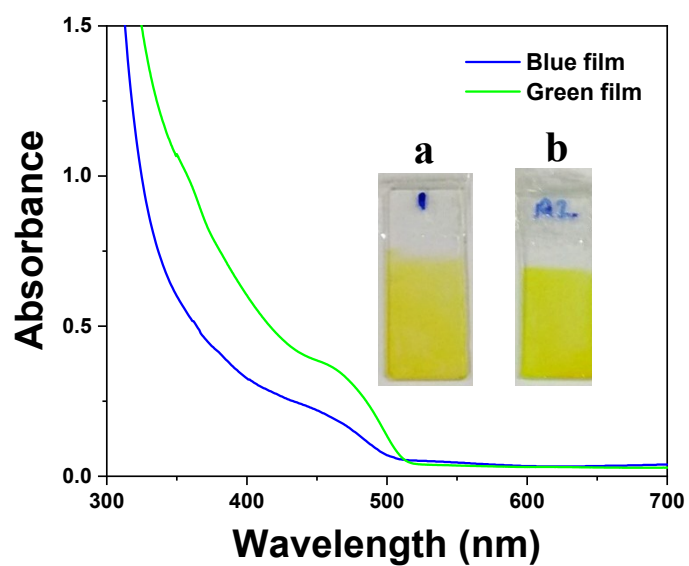

**Figure S3.** UV-visible spectra of the CsPbBr<sub>3</sub> NCs-Al<sub>2</sub>O<sub>3</sub> composite films. Inset shows the digital image of a) blue and b) green film at day light.

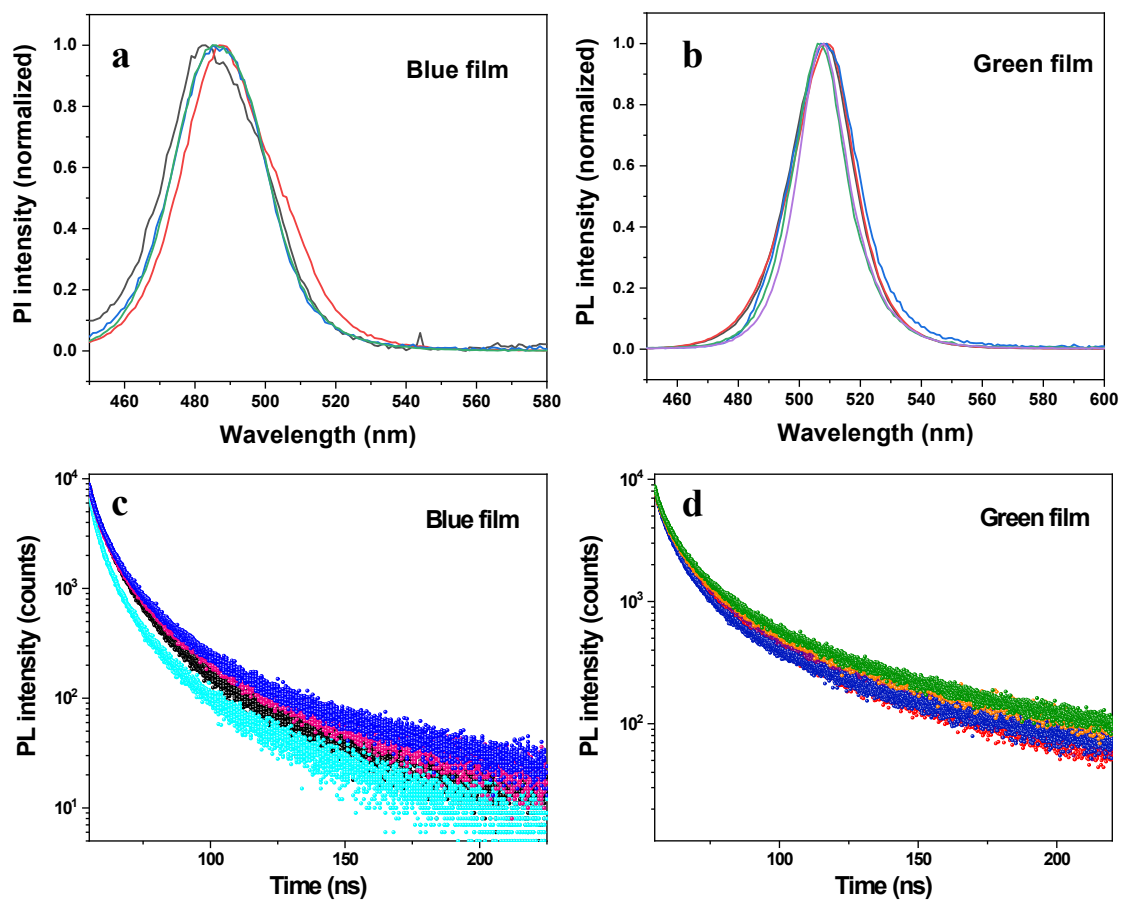

**Figure S4.** (a,b) Photoluminescence spectra and (c,d) decay curves of few blue and green films respectively on glass substrates. PL maxima of blue films range from 482-487 nm, whereas for green film 505-509 nm. Lifetimes range from 9-12 ns and 17-24 ns for blue and green films respectively.

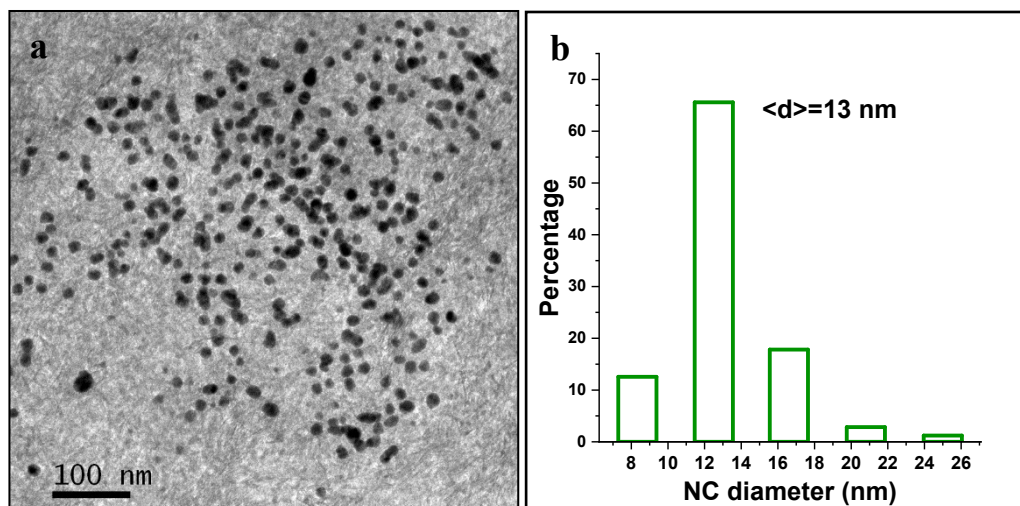

**Figure S5.** (a) TEM image showing the formation of larger CsPbBr<sub>3</sub> NCs (mean particle size is 13 nm, as evident from (b) particle size distribution) inside  $\gamma$ -Al<sub>2</sub>O<sub>3</sub> film while concentrations of precursors PbBr<sub>2</sub> and CsBr solutions were kept at 0.5 M and 0.1 M respectively.

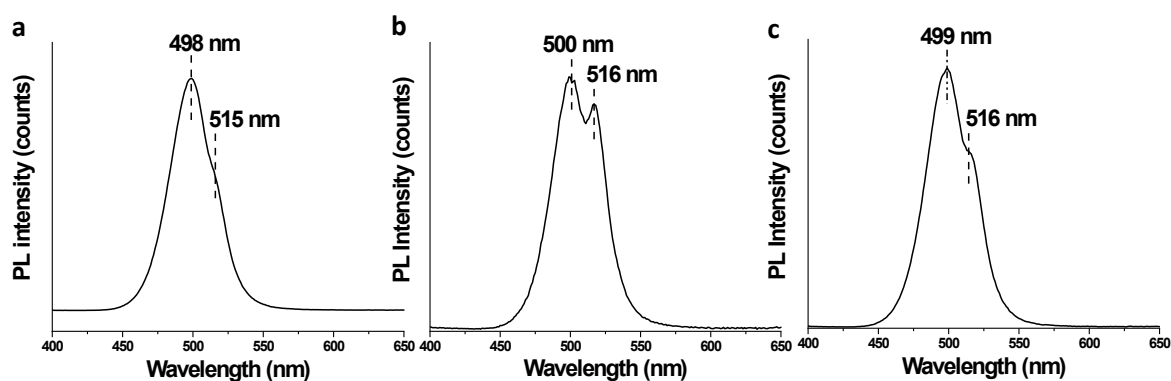

**Figure S6.** Photoluminescence spectra of few films (a-c) where higher concentrations of precursor solutions were used (PbBr<sub>2</sub> > 0.1 M, CsBr  $\geq$  0.1 M) for dipping. TEM image of one such combination has been shown in Figure S5.

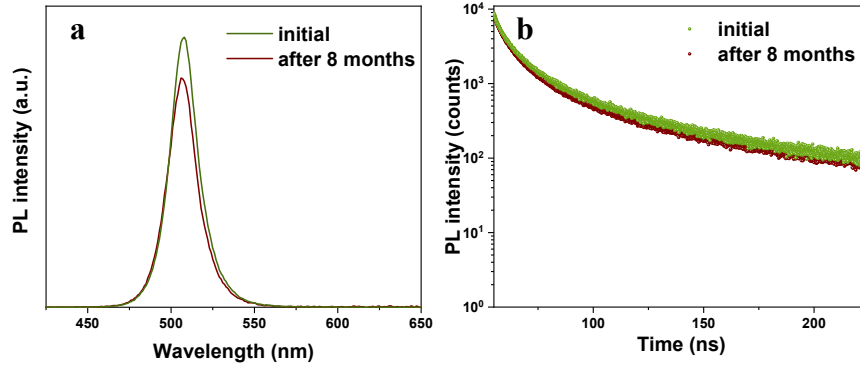

**Figure S7.** (a) PL spectra and (b) decay curves of CsPbBr<sub>3</sub> NCs-Al<sub>2</sub>O<sub>3</sub> composite films: as prepared and after 8 months.

**Table S1.** Fitting parameters for the tri-exponential PL decay graphs in Figure 2b ( $T_1$ ,  $T_2$ ,  $T_3$ : component lifetimes;  $A_1$ ,  $A_2$ ,  $A_3$ : relative amplitudes;  $\langle T_L \rangle$ : average luminescent lifetime), measured photoluminescence quantum yield (PL QY) and calculated radiative and non-radiative lifetimes ( $T_r$  and  $T_{nr}$ , respectively).

PL decay graphs were fitted using the tri-exponential function of the following form

$$A(t) = A_1 e^{-t/T_1} + A_2 e^{-t/T_2} + A_3 e^{-t/T_3}$$

Average lifetime  $\langle T_L \rangle$  is calculated as

$$\langle T_L \rangle = \frac{A_1 T_1^2 + A_2 T_2^2 + A_3 T_3^2}{A_1 T_1 + A_2 T_2 + A_3 T_3}$$

Radiative and non-radiative lifetimes were calculated according to the following equation

| Film type  | $T_1$ (ns) | $T_2$ (ns) | $T_3$ (ns) | $A_1$ (%) | $A_2$ (%) | $A_3$ (%) | $X^2$ | $\langle T_L \rangle$ (ns) | PL QY (%) | $T_r$ (ns) | $T_{nr}$ (ns) |
|------------|------------|------------|------------|-----------|-----------|-----------|-------|----------------------------|-----------|------------|---------------|
| Blue film  | 4.49       | 15.43      | 1.033      | 50        | 22        | 28        | 1.13  | 10.59                      | 41.32     | 25.63      | 18.05         |
| Green film | 6.35       | 25.34      | 1.34       | 48        | 23        | 29        | 1.20  | 18.08                      | 42.00     | 43.06      | 31.18         |

$$PL\ QY = \frac{\langle T_L \rangle}{T_r} = \frac{T_{nr}}{T_r + T_{nr}}$$

## References



- 1 B.E. Yoldas, *Am. Ceram. Bull.*, 1975, **54**, 289–290.
- 2 M. Grabolle, M. Spieles, V. Lesnyak, N. Gaponik, A. Eychmüller, U. Resch-Genger, *Anal. Chem.* 2009, **81**, 6285–6294.
